# Supplementary material for: Preoperative digital 6-minute walk test reveals risk of postoperative pulmonary complications in patients undergoing heart valve surgery: a pilot feasibility study
Source: PeerJ journal article supplement (doi:10.7717/peerj.19732), 2025-07-22
Supplement: abbreviations.docx [file abbreviations.docx]

**Supplementary table1:**

**List of abbreviations**

| **Abbreviations** | **Full name** |
| --- | --- |
| PPCs | Postoperative Pulmonary Complications |
| COPD | Chronic Obstructive Pulmonary Disease |
| 6MWT | Six-minute Walk Test |
| 6MWD | Six-minute Walk Distance |
| CABG | Coronary Artery Bypass Grafting |
| TAVR | Transcatheter Aortic Valve Replacement |
| SAVR | Surgical Aortic Valve Replacement |
| ECG | Electrocardiogram |
| SpO2 | Oxygen saturation |
| ARISCAT | Assess respiratory risk in surgical patients in Catalonia |
| MGS | Melbourne Group Scale |
| NYHA | New York Heart Association classification |
| ATS | American Thoracic Society |
| LR | Logistic Regression |
| SVM | Support Vector Machine |
| LDA | Linear Discriminant Analysis |
| KNN | K-Nearest Neighbor |
| RF | Random Forest Classifier |
| AUC | The area under the receiver operating characteristic curve |
| ACC | Accuracy |
| SHAP | Shapley additive explanation |
| CI | Confidence Interval |
| OR | Odds Ratio |
| MV_in_base | Mean inspiratory minute ventilation during baseline stage |
| MV_in_max | Maximum inspiratory minute ventilation during the walking phase |
| VT_ex_re | Mean expiratory tidal volume during recovery phase |
