# Supplementary material for: Preoperative digital 6-minute walk test reveals risk of postoperative pulmonary complications in patients undergoing heart valve surgery: a pilot feasibility study
Source: PeerJ journal article supplement (doi:10.7717/peerj.19732), 2025-07-22
Supplement: Data_107581_staffEH.xlsx [file Data_107581_staffEH.xlsx]

## Sheet: sheet1
Person ID	Clinical features																																											Physiological features
	Surgical method（1-TAVR，2-SAVR）	Height,(m)	Weight, (kg)	Weight（1-male，2-female）	Age,(years)	NYHA	Left ventricular diameter,(mm)	Left atrial diameter, (mm)	Right ventricular diameter, (mm)	Right atrial diameter, (mm)	Left ventricular end-diastolic volume, (ml)	Left ventricular end-systolic volume, (ml)	left ventricular ejection fraction,(%)	Pulmonary artery diameter, (mm)	Anemia	Glomerular filtration rate	FEV1-actual, (ml)	FEV1-predict, (%)	FVC-actual, (ml)	FVC-predict, (%)	MVV-actual, (ml)	MIP-actual, (cmH2O)	MIP-predict, (%)	FEV1/FVC, (%)	6MWD, (m)	Hypertension（0-No，1-Yes）	Asthma（0-No，1-Yes）	Respiratory Drugs（0-No，1-Yes）	Myocardial Infarction（0-No，1-Yes）	Smoking（0-No，1-Yes）	Respiratory infections in the last month（0-No，1-Yes）	Previous thoracotomy（0-No，1-Yes）	Neurological disorders（0-No，1-Yes）	Oral hypoglycaemic drugs（0-No，1-Yes）	Insulin hypoglycaemia（0-No，1-Yes）	Congestive heart failure（0-No，1-Yes）	Hypoxia（0-No，1-Yes）	Vasoactive drugs（0-No，1-Yes）	Intensive anti-heart failure（0-No，1-Yes）	Nutrition（0-No，1-Yes）	Weakness（0-No，1-Yes）	Sleep disorders（0-No，1-Yes）		br_base	br_end	br_recovery	br_wt_cv	brr1	br_max
1	1	149	53	2	74	3	63	48	20	38	205	142	30	23	0	56.72	1110	51.47	1600	58.1889	29	35	53.5988	69.375	180	1	0	1	0	0	0	0	0	0	0	1	0	0	0	1	1	0		23.491	26.1384	23.122	5.43423	3.01641	29.6768
2	1	163	41	2	74	3	71	48	22	42	262	134	48	30	0	46.25	1472	58.0727	1965	58.3317	34	32	49.0046	74.9109	300	0	0	1	1	0	0	0	0	0	0	1	0	0	0	1	1	1		28.0544	24.8826	23.1612	15.8517	1.72142	32.5406
3	1	149	51	2	73	2	53	36	22	36	135	51	62	23	0	88.09	1544	71.0163	1875	67.8331	50	47	71.9755	82.3467	390	1	0	1	0	0	0	0	0	0	0	1	1	0	0	0	0	0		24.4307	21.621	14.436	16.8878	7.18496	25.4049
4	1	167	61	1	82	3	51	43	21	36	126	46	64	26	1	31.43	1629	71.9027	2129	66.2826	49	38	49.8688	76.5148	330	1	0	1	0	0	0	0	0	0	0	1	0	0	0	0	0	0		23.2994	33.8651	25.1522	8.56294	8.71298	35.0346
5	1	150	46	2	63	2	54	35	21	36	140	54	62	20	0	34.77	1613	67.6799	2149	72.8048	46	55	73.2357	75.0582	450	1	0	1	0	0	0	0	0	0	0	1	0	0	0	0	0	0		26.2085	28.1748	18.9572	7.23429	9.21762	29.4126
6	2	168	55	2	68	3	47	50	23	52	104	35	67	21	0	67.51	2018	71.861	2406	64.7503	69	56	74.5672	83.8736	455	1	0	1	0	0	0	0	0	0	0	1	0	0	0	0	0	1		24.5288	25.0178	25.774	7.47835	-0.75624	30.2322
7	1	165	55	1	72	3	65	40	24	36	214	89	58	30	0	89.62	1625.38	67.6016	2534	76.889	56	85	111.549	64.1428	440	1	0	1	0	0	0	0	1	0	0	1	1	0	0	0	1	1		29.3435	31.5994	25.069	5.96019	6.53046	31.6862
8	1	158	45	2	67	2	42	27	20	27	79	32	59	20	0	73.65	1736	68.4652	2168	66.6707	59	60	79.8935	80.0738	420	0	0	1	0	0	0	0	0	0	0	1	0	0	0	0	0	0		14.2857	20.9577	25.142	20.5721	-4.18424	30.3147
9	1	165	70	1	89	3	77	49	20	37	312	174	44	34	0	71.69	1404	64.1375	1646	53.0583	27	30	39.3701	85.2977	240	1	0	1	1	1	0	0	0	1	0	1	1	0	0	0	0	0		25.2341	19.7909	17.1861	13.9348	2.60484	32.83
10	2	180	97	1	56	2	65	78	32	52	218	55	75	32	0	68.03	3365	99.1738	4007	88.3041	106	78	72.1554	83.978	370	1	0	0	0	1	0	0	0	0	0	1	0	0	0	0	0	0		25.1019	23.2552	25.3856	7.39877	-2.13037	30.8048
11	1	158	46	2	67	2	60	61	25	45	181	120	34	29	0	63.99	1423.37	56.1357	2044.07	62.8594	38	48	63.9148	69.6344	390	0	0	1	0	0	0	1	0	0	0	1	1	0	0	1	0	1		26.6453	27.9208	23.8463	6.13633	4.07453	32.9289
12	2	166	81	1	63	2	47	56	19	39	104	36	65	24	0	77	2241	83.0358	2691.22	75.1605	63	57	61.4887	83.2708	303	0	1	1	1	0	0	0	0	0	0	1	1	0	0	0	0	0		19.6163	22.1858	18.1189	15.7248	4.06693	30.6353
13	2	162	75	1	72	2	53	38	19	38	137	44	67	23	0	79.63	1878	80.7301	2461.84	77.8635	56	36	47.2441	76.2844	300	0	0	0	1	1	0	0	0	0	0	1	0	0	0	0	0	0		17.0844	18.4395	17.2262	6.71743	1.21331	24.0706
14	1	161	75	1	76	3	70	36	22	32	69	110	56	26	0	57.13	2374	107.769	2943	97.1685	54	54	70.8661	80.666	365	1	0	1	0	0	0	0	0	0	0	1	1	0	0	0	0	0		23.8728	26.0744	21.7422	5.81904	4.33217	32.5618
15	2	155	55	2	53	3	66	66	25	40	221	154	30	28	0	72.75	1417	51.9607	1908.59	56.9471	44	42	52.6976	74.2434	360	0	0	0	0	0	0	0	0	0	0	1	0	0	0	0	0	0		26.8349	26.4497	22.5938	4.76166	3.85591	31.2496
16	1	164	64	1	76	3	79	41	22	35	331	110	67	24	0	84.24	1442	63.3218	1769	56.019	36	46	60.3675	81.515	366	1	0	1	1	1	0	0	0	0	0	1	1	0	0	0	0	1		26.0295	23.8798	25.7512	12.4458	-1.87138	37.5709
17	1	151	60	1	75	2	66	38	21	35	222	108	51	25	0	58.85	1521	76.715	2370	89.8076	86	70	91.8635	64.1772	264	0	0	1	0	0	0	0	0	0	0	1	0	0	0	1	0	0		28.8438	29.5221	26.2451	6.7036	3.27706	32.3098
18	2	172	54	1	32	2	79	63	21	25	227	131	58	25	0	95.73	3146	82.9087	3881	82.0389	96	94	73.1518	81.0616	520	0	0	0	0	1	0	0	0	0	0	1	0	0	0	1	0	0		23.4971	28.5105	22.8158	6.98343	5.69477	31.0582
19	2	167	65	1	55	2	48	55	22	55	106	38	64	30	0	65.48	2894	96.4633	3514	91.0425	118	88	81.4061	82.3563	444	0	0	0	0	0	0	1	1	0	0	1	0	0	0	0	0	0		20.6398	26.9433	22.8231	10.2645	4.12021	28.6897
20	1	165	57.5	1	82	3	52	36	18	35	130	32	75	23	0	45.46	1730	78.034	2112	67.5691	50	55	72.1785	81.9129	279	0	0	0	0	1	0	0	0	0	0	1	1	0	0	1	0	0		23.2788	18.8682	23.6828	11.5616	-4.81454	27.8739
21	2	150	63	2	54	3	59	43	23	41	177	75	58	22	0	84.9	1916	75.0437	1914	61.7941	41	50	62.7353	100.104	327	1	0	0	0	0	0	0	0	0	0	1	1	0	0	0	0	0		19.8018	24.0426	16.0415	16.3062	8.00117	28.2527
22	1	144	53	2	72	2	46	35	17	34	97	22	77	20	0	77.48	765	37.1115	1473	57.2625	42	39	59.7243	51.9348	354	1	0	0	0	0	0	0	0	1	0	1	1	0	0	0	0	1		22.8537	28.1959	28.4272	9.67711	-0.231375	34.5062
23	2	150	50	2	64	2	43	59	19	24	81	19	76	18	0	73.99	1385	58.5471	1886	64.2437	64	58	77.2304	73.4358	441	0	0	0	0	0	0	0	0	0	0	1	0	0	0	0	0	1		16.3274	28.5966	23.5092	9.50621	5.08732	29.5346
24	2	160	59	2	58	3	53	51	18	42	138	47	66	22	0	91.99	1686	60.5906	2043	58.2465	56	65	81.5558	82.5257	450	1	0	0	1	0	0	0	0	0	0	1	0	0	0	0	0	0		20.841	24.9831	21.2973	7.72848	3.68583	26.8879
25	2	172	104	1	47	2	66	52	30	54	224	88	61	30	0	103.28	2830	82.7143	4050	92.772	47	99	84.5431	69.8765	396	1	0	0	0	0	1	0	0	0	0	0	1	0	1	0	0	0		21.558	27.6633	17.7649	12.5614	9.89839	34.3945
26	1	152	52	1	81	3	58	52	24	34	169	60	65	35	0	80.05	2163.16	112.881	1495	57.5155	47	68	89.2388	144.693	330	1	0	0	0	0	0	0	0	0	0	1	1	0	0	0	1	1		29.4899	33.7612	36.2089	15.6433	-2.44772	44.3836
27	1	145	53.5	2	63	2	65	36	19	29	215	62	71	24	0	67.81	1507	67.209	1683	61.5595	35	35	46.6045	89.5425	349	1	0	0	1	0	0	0	1	0	0	0	1	0	0	0	0	0		25.4995	26.9323	28.6932	5.74186	-1.7609	31.3217
28	1	150	56	2	70	2	47	49	25	43	104	39	63	31	0	63.6	1036	45.9875	1348	47.3271	24	28	42.879	76.8546	340	0	0	0	0	0	0	1	1	0	0	1	1	0	0	0	1	0		19.4634	30.12	24.0027	10.4071	6.11731	30.3506
29	2	150	52	2	44	3	39	20	23	31	66	16	75	19	0	73.06	2135	77.9132	2296	70.1026	67	60	64.5856	92.9878	560	0	0	0	0	0	0	0	0	0	0	0	0	0	0	0	0	0		22.4243	28.2191	33.2419	13.2402	-5.02282	43.3675
30	1	172	70	1	65	3	44	33	23	36	88	26	71	21	0	92.01	2460	87.5727	3060	80.1293	72	68	73.3549	80.3922	370	0	0	1	1	0	0	0	0	0	0	1	0	0	0	0	0	0		27.185	30.019	24.3496	8.22692	5.66932	34.0339
31	2	165	67.5	1	58	3	63	40	22	40	204	49	76	22	0	67.86	1780	62.8049	2240	61.018	45	42	38.8529	79.4643	506	1	0	0	0	0	0	0	0	0	0	1	0	0	0	0	0	0		21.9905	20.6787	19.1423	8.03594	1.53646	25.6105
32	2	154	68	2	46	2	42	42	21	30	80	30	63	23	0	80	1960	69.1036	2656	77.2616	85	64	68.8913	73.7952	485	0	0	0	0	0	0	0	0	0	0	1	0	0	0	0	0	0		28.1776	27.3689	22.1246	6.25589	5.24435	33.6083
33	1	158	56	1	80	3	52	39	24	36	131	76	42	23	0	80	971	47.1703	1441	50.7339	36	40	52.4934	67.3838	400	0	0	1	0	1	0	0	0	0	0	1	1	0	0	0	0	0		23.7167	29.1092	28.5158	5.53615	0.593384	32.3185
34	2	162	69	1	70	3	63	40	24	34	213	63	70	29	0	76	2510	105.512	2947	91.7666	88	65	85.3018	85.1714	510	0	0	0	0	0	0	0	0	0	0	0	1	0	0	0	0	0		19.4836	21.5687	22.9647	6.50742	-1.39597	27.2334
35	2	161	65	1	67	2	60	50	23	41	178	60	66	22	0	71	1492	61.2534	1900	58.6324	52	49	52.8587	78.5263	340	0	0	0	0	0	0	0	0	0	0	1	1	0	0	1	0	0		31.7379	37.6052	40.9276	8.02813	-3.32246	44.0019
36	2	168	93	1	42	2	60	66	21	37	182	52	72	24	0	88	3034	89.2927	3933	92.0834	119	95	81.1272	77.1421	580	0	0	0	0	1	0	0	0	0	0	1	0	0	0	0	0	0		23.7842	33.5271	18.36	15.0328	15.167	38.247
37	1	161	57	1	69	2	62	51	24	40	191	44	77	22	0	40	1924	80.8715	2587	81.0962	55	50	53.9374	74.3719	510	1	0	0	0	1	0	0	0	0	0	1	1	0	0	0	0	0		23.2668	28.5676	22.0804	6.696	6.48719	29.7947
38	1	178	72	1	52	2	63	43	23	38	173	66	62	23	0	68	3198	91.9828	3840	84.2398	140	74	68.4551	83.2812	473	1	0	0	0	0	0	0	0	0	0	1	0	0	0	0	0	1		22.3358	19.3911	20.14	6.56166	-0.748894	27.0721
39	2	167	64	1	58	2	59	40	20	44	171	72	58	21	0	85	2076	71.6782	2832	75.0711	69	73	67.5301	73.3051	388	1	0	0	0	1	0	0	1	1	0	1	1	0	0	0	0	0		24.1653	22.8448	23.379	14.271	-0.534178	34.339
40	2	165	55	1	61	2	71	44	22	41	263	133	49	23	0	69	1771.68	64.7901	2768	77.2041	98	65	70.1187	64.0056	570	0	0	0	0	0	0	0	0	0	0	1	0	0	0	0	0	0		30.0621	28.3201	27.3586	7.26905	0.961488	39.834
41	1	165	59	1	71	3	50	51	23	66	120	47	33	26	0	81	1731	71.1952	2243	67.4976	89	74	97.1129	77.1734	309	1	0	1	0	1	0	0	0	0	0	1	0	0	0	0	0	0		25.6412	22.3661	19.9158	6.85208	2.45026	28.813
42	1	160	68	1	64	3	65	44	22	44	214	102	52	25	0	65.82	1678	67.1966	2246	68.749	50	43	46.3862	74.7106	275	0	0	0	0	1	0	0	0	0	0	1	0	0	0	0	0	0		30.8126	33.9089	33.4368	9.83012	0.472092	42.518
43	2	170	55	1	51	2	56	47	22	37	156	69	56	21	0	74.37	2693	83.3008	3650	88.244	41	85	78.6309	73.7808	480	0	0	0	0	0	0	0	0	0	0	1	0	0	0	0	0	0		22.4355	29.5369	24.0248	10.4928	5.51208	34.8675
44	2	170	61	1	55	3	58	36	21	34	167	36	66	20	0	102	2519	81.3168	3348	83.3193	98	78	72.1554	75.2389	410	0	0	0	0	1	0	0	0	0	0	1	0	0	0	0	0	0		22.0219	25.0978	22.9802	7.06566	2.1176	29.9664
45	2	155	73	1	68	3	50	42	24	39	123	49	61	21	0	49.68	1420	76.7384	1580	68.99	43	32	49.0046	89.8734	450	1	0	0	0	0	0	0	0	0	0	1	0	0	0	0	0	0		21.5409	17.7972	22.1774	21.874	-4.38019	32.6477
46	1	160	70	1	56	2	47	44	20	36	102	35	65	22	0	102.25	1641	59.779	2406	69.2003	50	65	60.1295	68.2045	400	0	0	0	0	0	0	1	0	0	0	1	0	0	0	0	1	0		20.5439	23.564	20.852	7.66748	2.71196	26.2315
47	1	156	58	1	77	2	43	41	24	59	82	38	54	26	0	80.49	1731	84.0906	2243	80.0267	89	74	97.1129	77.1734	303	1	0	0	0	0	0	1	0	0	0	1	0	0	0	0	0	0		26.1878	28.5259	27.5631	17.1112	0.962814	37.1044
48	2	160	65	1	27	2	70	73	21	32	258	93	64	20	0	122	2006	57.315	2645	64.8235	80	102	79.6875	75.8412	386	0	0	0	0	0	0	0	0	0	0	1	0	0	0	0	0	0		28.9484	32.1118	21.5676	9.0022	10.5442	38.2451
49	2	163	67	1	51	2	57	40	22	33	159	54	66	19	0	103.4	2048	68.3276	2420	64.342	54	50	46.2535	84.6281	456	0	0	0	0	0	0	0	0	0	0	1	0	0	0	0	0	0		32.9649	29.723	22.9862	4.50901	6.73688	33.5507
50	2	168	59	1	61	2	56	42	21	34	152	44	71	22	0	87.28	2230	78.9497	2570	68.8201	65	62	66.8824	86.7704	446	0	0	0	0	0	0	0	0	0	0	1	0	0	0	0	0	0		25.1833	29.0124	20.2052	11.6002	8.80712	32.184
51	1	162	59	2	63	2	67	40	18	38	137	80	37	23	0	99.23	1472	53.7775	1965	55.9395	34	32	42.6099	74.9109	423	0	0	0	0	0	0	0	0	0	1	1	0	0	0	0	0	1		23.8662	30.417	25.9602	12.9292	4.4568	37.4065
52	2	171	68	1	57	2	68	43	32	24	240	125	48	23	0	97.33	2584	84.5046	3180	79.2986	75	67	61.9796	81.2579	408	0	0	0	0	1	0	0	1	0	0	1	1	0	0	0	0	1		23.4179	23.859	25.2344	2.89089	-1.37535	26.8874
53	1	150	54	2	68	2	53	35	22	33	138	54	61	24	0	78.29	3284	143.391	3762	130.81	82	69	91.8775	87.294	444	0	0	0	0	0	0	0	0	0	0	0	0	0	0	0	0	0		24.5435	19.9788	21.4973	12.868	-1.51856	30.9477
54	2	153	60	1	68	3	77	49	24	35	208	139	52	23	0	89.6	3275	149.039	3874	135.275	92	79	85.2211	84.5379	480	1	0	0	0	0	0	0	0	0	0	1	0	0	0	0	0	0		22.1483	31.1042	32.8476	9.51818	-1.74341	40.875
55	1	173	78	1	66	2	48	42	27	44	107	32	69	23	1	89.4	2464	87.797	2860	74.4661	45	40	43.1499	86.1538	354	0	0	0	0	1	0	0	0	0	0	1	1	0	1	1	0	0		20.7446	25.7418	21.1014	5.2782	4.64031	29.5869
56	2	169	60	1	58	3	40	37	24	33	69	19	72	19	0	96.65	2230	75.3638	2570	66.3168	65	62	57.3543	86.7704	456	0	0	0	0	1	0	0	0	0	0	1	0	0	0	1	0	1		23.625	26.8248	19.1845	7.48176	7.64025	31.1686
57	2	161	66	1	67	2	51	34	21	37	73	34	53	22	0	79.05	2140	87.8568	2680	82.7026	73	64	69.0399	79.8507	363	1	0	0	1	1	0	0	1	0	1	0	0	0	0	0	0	0		17.7944	21.9245	16.7277	6.30626	5.1968	27.0222
58	2	168	73.5	1	55	3	68	55	26	46	243	101	58	30	0	87.21	1890	62.3247	2320	59.3019	63	59	54.5791	81.4655	227	0	0	0	0	0	0	0	0	0	0	1	0	0	0	0	0	0		21.2466	27.3448	24.3463	8.00519	2.99848	30.4264
59	1	143	50	2	76	3	43	43	24	51	82	28	65	28	0	78.1	1420	71.9787	1580	63.656	43	32	49.0046	89.8734	318	1	0	0	0	0	0	0	0	0	0	1	0	0	0	0	0	0		29.7971	25.1548	23.9164	15.3618	1.23839	37.0883
60	1	164	67	1	72	3	58	53	22	37	177	106	40	28	0	62.23	1988	83.5928	2418	74.3846	84	42	55.1181	82.2167	230	1	0	0	0	0	0	0	1	1	0	1	1	0	0	0	0	1		25.71	33.1592	24.4584	13.6887	8.70082	37.5861
61	1	168	74	1	76	2	64	46	30	37	262	113	56	24	0	87.14	2134	89.7333	2506	75.1497	54	43	56.4304	85.1556	350	1	0	0	0	1	0	0	0	0	0	0	0	0	0	0	0	0		25.6027	28.1877	24.0449	4.64242	4.14279	30.6548
62	1	162	59	2	66	3	58	41	23	32	164	61	62	23	0	68.46	2328	87.1337	2760	79.7809	44	49	65.2463	84.3478	414	0	0	0	0	0	0	0	0	0	0	0	0	0	0	0	0	0		22.471	22.1335	15	7.38935	7.13346	25.6272
63	1	163	49.5	1	71	3	66	39	28	41	201	122	39	31	0	48.65	1450	60.9608	2008	62.1151	56	50	65.6168	72.2112	451	0	0	0	0	0	0	0	0	0	0	1	0	0	0	0	1	0		19.9169	22.1851	17.5118	9.01779	4.67339	28.1329
64	2	159	55	1	54	3	49	29	17	35	116	36	68	21	0	99.41	2028	73.0431	2462	70.7283	45	40	37.0028	82.3721	550	1	0	0	0	1	0	0	0	0	1	1	0	0	0	0	0	0		28.9692	33.1516	26.763	5.80193	6.38862	35.6784
65	2	156	66.5	2	51	3	50	49	24	57	129	67	48	28	0	62.31	1480	52.8503	1672	48.604	60	55	69.0088	88.5167	280	0	0	0	0	0	0	0	1	0	0	1	0	0	0	0	0	1		22.8476	29.7355	31.2043	16.2116	-1.46883	36.1376
66	1	151	56	1	72	2	67	44	23	52	236	89	63	19	0	86.18	2620	127.815	3202	118.724	67	62	81.3648	81.8239	325	1	0	1	0	0	0	0	0	0	0	1	0	0	0	0	0	0		18.4889	15.2711	15.9622	9.96305	-0.691106	26.9377
67	2	165	70	1	56	2	51	109	21	65	126	49	61	26	0	105.41	2939	101.297	3119	83.6784	52	44	40.7031	94.2289	420	0	0	0	0	1	0	0	0	1	0	0	1	0	0	0	1	0		25.5465	33.6212	26.6616	9.29764	6.95961	35.0622
68	2	158	55	2	65	2	47	46	20	60	105	36	66	27	0	63.04	1740	67.5546	2016	61.3313	50	52	69.241	86.3095	455	0	0	0	0	0	0	0	0	0	0	1	0	0	0	0	0	1		24.7937	29.9695	26.1722	6.77654	3.79728	33.2635
69	2	150	50	2	66	2	53	43	18	33	136	78	42	27	1	71.79	2014	86.5756	2420	83.2478	73	60	79.8935	83.2231	300	0	0	0	0	0	0	0	0	1	0	1	0	0	0	0	1	0		23.5064	27.1478	21.056	4.89882	6.09175	30.3731
70	2	168	67	1	65	3	45	42	26	36	90	22	76	29	0	81.29	2048	76.0587	2420	66.8328	54	50	53.9374	84.6281	455	0	0	0	0	0	0	0	0	1	0	1	0	0	0	0	0	0		22.8509	25.6029	19.5979	6.14125	6.00497	29.8915
71	1	160	60	1	69	3	72	48	28	57	273	174	36	22	0	86.26	1420	60.3597	1830	58.1799	56	42	45.3074	77.5956	420	0	0	0	0	0	0	1	0	0	0	1	0	0	0	0	1	0		25.5725	31.3744	22.4008	6.47138	8.97355	32.9381
72	1	156	65	1	76	2	61	38	23	36	180	100	56	22	0	85.65	2350	112.91	2783	98.6792	62	59	77.4278	84.4413	240	0	0	0	0	0	0	0	0	0	0	1	1	0	0	0	0	0		31.1394	26.9078	24.9455	7.47755	1.96223	32.4346
73	1	166	55	1	74	2	53	38	24	38	134	56	58	22	0	89.98	3280	137.98	3560	108.113	73	69	90.5512	92.1348	360	0	0	0	0	1	0	0	0	0	0	1	0	0	0	0	0	0		24.0179	22.3613	21.1197	5.89717	1.24157	27.2419
74	1	168	54	1	75	2	55	44	20	33	147	70	52	24	0	91.05	1904	79.2614	2340	69.6671	56	49	64.3045	81.3675	390	1	1	1	1	1	1	0	0	0	0	1	1	0	0	0	0	0		31.936	38.4584	27.2961	5.61311	11.1623	38.5641
75	1	174	78	1	71	3	76	49	24	43	303	165	46	36	0	82.56	2428	90.7623	3034	80.9704	73	69	90.5512	80.0264	410	1	0	1	1	0	0	0	1	0	0	1	1	0	0	1	1	0		15.0632	23.1872	17.7193	8.45583	5.46788	25.4371
76	1	155	70	2	67	2	56	37	21	37	161	69	57	23	0	74.89	2784	113.65	3246	104.243	68	61	81.225	85.7671	480	0	0	0	0	0	0	0	0	0	0	0	0	0	0	0	1	0		19.398	29.0738	27.5871	11.0701	1.48676	37.0575
77	1	160	65	1	72	3	57	42	20	35	141	94	33	20	0	77.39	2890	127.041	3280	106.695	78	75	98.4252	88.1098	420	0	0	0	0	0	0	0	0	0	0	1	0	0	0	0	0	0		27.3438	29.8845	26.0974	3.31824	3.78705	33.511
78	1	166	70	1	74	2	56	58	22	39	152	63	58	20	0	86.86	2528	106.345	2879	87.4322	67	62	81.3648	87.8083	540	1	0	0	1	0	0	0	0	1	0	1	1	0	0	0	0	1		18.8344	27.0061	15.9502	9.66493	11.0559	30.3395
79	1	152	53	2	68	2	58	44	19	53	166	108	35	20	0	69.66	1790	76.3175	2425	81.8332	64	58	77.2304	73.8144	380	1	0	0	0	0	0	0	0	0	0	1	0	0	0	0	0	1		26.4272	30.7588	23.7542	4.95844	7.00463	33.5895
80	2	157	55	2	55	3	42	31	24	30	80	25	70	19	0	100.53	2001	72.6941	2703	79.1655	56	43	53.9523	74.0289	480	0	0	0	0	0	0	0	0	0	0	0	0	0	0	0	0	0		19.8514	30.3518	18.7402	14.6085	11.6116	33.7558
81	2	163	82	1	52	2	65	63	23	44	212	128	40	21	0	95.76	2986	100.624	3450	92.3517	62	59	54.5791	86.5507	412	1	0	0	0	0	0	0	0	0	0	1	1	0	0	0	1	0		27.2151	29.1849	23.7893	9.97743	5.39563	35.0065
82	2	167	71	1	66	3	62	44	23	43	195	67	65	23	0	70.67	1563	59.3441	2386	67.2856	62	53	57.1737	65.5071	350	1	0	0	1	1	0	0	0	1	0	0	1	0	1	0	1	0		23.8544	32.2787	24.3065	8.62312	7.97213	36.5521
83	1	164	67	1	72	2	49	33	20	36	113	40	65	20	0	68.62	2795	117.526	1966	60.4798	49	47	61.6798	142.167	370	1	0	0	0	1	0	0	0	0	0	1	0	0	0	0	0	0		23.8711	25.6162	23.1879	5.74435	2.42827	29.7257
84	2	154	40	2	55	3	63	116	23	85	201	73	64	39	0	62.21	726	27.3063	1299	39.7414	30	32	40.1506	55.8891	345	0	0	0	0	0	0	0	0	0	0	1	1	0	1	1	2	0		24.1182	26.7596	21.7943	9.21339	4.96526	33.9329
85	2	145	6	2	71	2	60	40	20	38	181	95	48	27	0	87.86	1238	58.8322	1285	48.9682	39	31	47.4732	96.3424	380	1	0	0	0	0	0	0	0	0	0	1	1	0	0	0	1	0		27.7867	24.0243	24.0295	7.41108	-0.00527828	28.1165
86	2	169	69	1	67	2	57	45	24	35	205	105	46	22	0	71.07	2445	91.9919	3479	96.2105	76	62	66.8824	70.2788	483	0	0	0	1	1	0	0	0	1	0	1	1	0	1	0	1	0		22.74	25.7559	22.3077	9.15899	3.44815	29.9671
87	1	168	57	1	91	3	51	29	37	53	122	41	66	30	0	40.34	2598	115.292	3862	119.765	65	57	74.8031	67.2708	485	0	0	0	0	0	0	0	0	0	0	1	0	0	0	0	0	1		21.1377	28.0114	26.5125	7.55101	1.49895	33.0268
88	2	169	59	1	58	3	48	47	39	49	106	45	58	26	0	81.92	2380	80.4332	3589	92.6112	64	71	65.6799	66.3137	450	0	0	0	0	0	1	0	0	0	0	1	0	0	0	0	0	0		23.6688	25.0272	20.6934	5.4276	4.33378	29.3414
89	1	151	58	2	80	3	53	51	22	36	135	44	67	22	0	69.52	1478	69.994	2053	74.5159	44	49	75.0383	71.9922	183	1	0	0	0	0	0	0	0	0	0	1	1	0	0	0	2	0		18.5164	24.9678	24.3088	20.3491	0.659003	39.6753
90	1	158	53	1	71	3	60	39	16	39	182	127	30	20	0	69.99	2178	96.8463	2983	99.0098	105	61	80.0525	73.0137	400	0	0	0	0	1	0	0	0	0	0	1	0	0	0	1	0	0		24.9909	29.5933	22.9379	7.66766	6.65539	35.615
91	2	168	75	1	61	3	51	36	20	32	124	44	65	24	0	64.93	2687	95.1291	3503	93.8041	110	95	102.481	76.7057	450	0	0	0	0	0	0	0	0	0	0	0	1	0	0	0	1	0		16.5337	28.5438	11.1686	14.8641	17.3752	29.2844
92	2	149	44	2	50	2	46	65	27	73	98	49	50	26	0	95.5	1577	60.7323	1955	62.6807	45	28	35.1317	80.665	450	0	0	0	0	0	0	0	0	0	0	1	0	0	0	0	0	0		20.9952	28.561	27.4608	20.9169	1.10019	30.7599
93	1	158	40.5	1	86	3	45	41	20	38	93	36	57	22	0	71.14	1417	69.6115	2682	95.056	50	44	57.7428	52.8337	409	0	0	0	0	0	0	0	0	0	0	1	1	1	0	1	0	0		22.1454	17.0516	20.4541	15.0597	-3.40253	25.1862
94	2	158	52	1	63	3	90	40	19	36	451	348	23	29	0	66.29	2504	101.403	3460	108.048	79	77	83.0636	72.3699	390	0	0	0	1	1	0	0	0	0	0	1	1	0	1	0	0	0		19.6266	17.0547	23.4659	13.1998	-6.41112	30.3362
95	1	150	52	2	71	3	57	37	20	34	164	53	68	21	0	68.21	1284	57.4077	1284	45.3199	45	42	64.3185	100	386	1	0	0	0	0	0	0	0	0	0	0	0	0	0	0	1	0		20.045	13.0628	20.2656	19.1973	-7.20283	27.4953
96	2	150	55	2	56	2	39	41	22	42	67	20	70	20	0	67.15	1730	68.7572	2046	66.8092	60	51	63.99	84.5552	400	0	0	0	0	0	0	0	0	0	0	0	0	0	0	0	0	0		22.1592	18.8186	16.8564	16.6213	1.96224	28.2977
97	1	163	52	1	62	2	59	40	20	31	171	43	74	20	0	65.22	2902	109.737	3436	99.256	87	99	106.796	84.4587	324	1	0	0	0	0	0	0	0	0	0	0	0	0	0	0	0	0		16.9851	21.1921	14.4297	21.4959	6.76246	25.9155
98	2	162	62.5	2	32	3	52	72	20	45	129	62	52	32	0	95.77	2136	64.5414	2423	60.5537	77	44	49.4382	88.1552	420	0	0	0	0	0	0	0	0	0	0	1	0	0	0	0	0	0		24.9918	26.9587	22.1769	11.538	4.78186	33.1363
99	1	164	65	1	67	3	76	47	24	38	304	163	46	30	0	48.19	1429	56.7503	1429	42.295	58	53	57.1737	100	337	0	0	0	0	0	0	0	0	0	0	1	0	0	0	0	0	0		18.49	18.0466	21.4366	19.3413	-3.38997	31.0847
100	1	150	60	2	77	2	47	49	23	35	100	34	66	24	0	77.56	1053	49.3728	1327	48.1895	26	28	42.879	79.3519	389	1	0	1	0	0	0	0	0	0	0	1	1	0	0	0	0	0		19.5065	15.9025	20.37	16.3976	-4.46749	27.5341
101	1	160	62	1	66	2	44	29	20	30	86	31	63	22	0	90.87	2836	116.301	3802	118.116	95	90	97.0874	74.5923	360	1	0	0	0	0	0	0	0	1	0	0	0	0	0	0	1	0		22.7587	18.8952	19.1158	4.95179	-0.220606	25.3684
102	1	160	55	1	69	2	59	61	25	31	179	66	63	19	1	25.53	2206	93.7701	3471	110.351	65	59	63.6462	63.5552	391	1	0	0	0	0	0	0	0	0	0	1	0	0	0	1	0	0		18.515	14.6111	21.7874	14.0747	-7.17626	19.1205
103	1	160	55	1	74	3	60	45	21	38	184	120	35	26	0	62.83	422	18.9678	640	21.1231	23	17	22.3097	65.9375	405	0	0	1	0	0	0	0	0	0	0	1	1	0	1	1	1	0		31.0444	20.6726	22.958	14.9696	-2.2854	34.2365
104	2	169	75	1	51	3	60	59	21	37	182	67	63	24	0	89.69	2953	92.3179	4015	98.3718	145	110	101.758	73.5492	375	0	0	0	0	0	0	0	0	0	0	0	0	0	0	0	0	0		17.1829	17.1854	14.6424	14.6104	2.54301	27.1454
105	2	164	67	1	52	2	60	47	20	35	175	76	56	24	0	97.2	2820	93.9901	3717	98.1325	107	103	95.2821	75.8676	450	0	0	0	0	0	0	0	0	0	0	0	1	0	0	0	0	0		15.1545	21.3892	15.9812	16.025	5.40796	25.6704
106	1	158	61	1	65	2	56	49	20	32	154	44	71	25	0	80.16	2143	88.8773	3002	95.2451	62	59	63.6462	71.3857	520	1	0	0	0	0	0	0	0	0	0	1	0	0	0	0	0	0		19.1228	21.2143	19.9967	19.9123	1.21766	28.3826
107	2	168	78.5	1	69	3	58	46	26	40	165	66	60	24	0	71.91	2064	80.3613	2216	63.0935	62	54	58.2524	93.1408	440	0	0	1	0	1	0	0	0	0	0	1	0	0	0	0	0	1		14.7634	18.1567	25.8374	18.8432	-7.6807	30.2706
108	2	150	43.5	2	77	4	40	51	21	46	70	26	62	24	0	41.37	1431	67.0964	1793	65.1121	32	32	49.0046	79.8104	320	1	0	0	0	0	0	0	0	0	0	1	1	0	1	1	1	1		12.2077	12.7794	16.439	19.3815	-3.65962	21.8439
109	1	173	75	1	65	3	54	36	19	36	141	43	70	25	0	89.57	1630.16	57.4294	2946	76.1395	104	65	70.1187	55.3347	450	1	0	0	0	1	0	0	0	0	0	1	1	0	0	0	0	0		25.0326	21.9584	19.8094	5.17713	2.14897	28.9407
110	1	138	32	2	76	4	57	54	20	32	162	93	43	22	0	94.46	1130	61.0665	1308	57.1132	27	22	33.6907	86.3914	367	0	0	0	0	0	0	0	0	0	0	1	1	0	1	1	0	0		29.1144	29.5573	20.0589	6.8597	9.4984	33.2886
111	1	163	55	1	72	3	66	51	22	32	275	139	50	21	0	72.28	1554.26	66.0779	2990	93.2617	87	61	80.0525	51.9821	335	1	0	0	0	1	0	0	0	1	0	1	0	0	0	0	0	0		19.1419	21.3311	17.75	7.22434	3.58111	24.2527
112	2	148	40	2	75	2	39	57	23	31	66	20	70	17	0	72.01	1370	64.7571	2117	78.504	68	69	105.666	64.7142	240	0	0	0	0	0	0	0	0	1	0	1	0	0	0	0	0	0		19.2018	18.4494	26.1694	18.3772	-7.71992	28.7064
113	1	165	56	1	63	3	59	38	18	37	149	90	40	19	0	61.22	1917	71.807	2524	71.4599	58	49	52.8587	75.9509	444	0	0	0	1	1	0	0	1	0	0	1	0	0	0	0	0	0		16.3337	21.1801	23.0829	9.21916	-1.90281	24.6106
114	1	150	50	2	71	3	59	60	21	50	172	108	37	35	0	78.03	1104.11	49.3649	1267	44.7198	21	39	59.7243	87.1437	399	0	0	0	0	0	1	0	0	0	0	1	1	1	1	1	0	0		25.4589	23.0912	19.0614	9.46722	4.02974	28.2729
115	2	167	65	1	61	3	78	45	24	38	327	143	56	31	0	94.64	2475	88.5698	3433	93.1789	97	89	96.0086	72.0944	669	0	0	0	1	1	0	0	0	0	0	0	1	0	0	0	0	0		22.4491	26.4627	16.8132	11.2196	9.64949	31.3909
116	1	163	71	1	74	2	75	50	24	33	303	177	42	29	0	75.25	2066	89.8092	2206	69.814	67	66	86.6142	93.6537	474	0	0	0	1	0	0	0	0	0	0	1	1	0	0	0	0	0		28.7753	28.9659	24.805	4.39468	4.16091	34.5255
117	1	150	55	2	74	3	39	38	18	35	68	23	66	21	0	88.17	1017.2	46.6027	2095	75.0476	48	36	55.1302	48.5537	295	1	0	0	0	0	0	0	0	1	0	1	1	0	0	0	2	0		23.4106	15.6565	17.7609	10.698	-2.10439	25.426
Notes: Definitions of physiological features refer to Table2.																	1991.69	78.1663	2523.33	75.5788	63.0085	57.2564	66.939	79.5146	395.983
																	626.756	22.5182	765.033	19.554	24.0877	19.0567	18.1156	13.0877	84.2141
[truncated: 49 more columns]
